# Supplementary material for: Profiling the cell-specific small non-coding RNA transcriptome of the human placenta
Source: Research Square preprint supplement (doi:10.21203/rs.3.rs-5953518/v1), 2025-02-12

## Supplementary Methods

### Summary of sample processing and quality control

As the first exploratory study of the sncRNA transcriptome of sample-matched placental cells and chorionic villi (CV), we undertook an in-depth examination of sample quality. From the raw, unfiltered data, 9485 distinct sncRNAs had expression in at least one sample (**Supplementary Methods Table 1**). Overall, the total number of reads and the total percentage of mapped reads were variable across the sorted cell types (**Supplementary Methods Figure 1a and 1b**), and CV samples showed about twice as many total reads than the sorted-cells (**Supplementary Methods Figure 2**). As bulk tissue sequencing captures the average gene expression across several different cell types including the added contribution of syncytiotrophoblast, a higher number of sequences are detected and sequenced in bulk tissue, and can lead to a higher total read count as compared to individual cell types. The expected mapping rate of 30-50% was observed for the majority of samples, in consensus with the sequencing chemistry for this project (**Supplementary Methods Table 2**).

**Supplementary Methods Table 1:** Characteristics of human sncRNAs. All databases accessed 20 January 2025. Abbreviations - miRNA: microRNA; mRNAs: messenger RNA; RISC: RNA-induced silencing complex; siRNA: small interfering RNA; piRNA: piwi-interacting RNA; piRISC: piRNA-induced silencing complex; rRNAs: ribosomal RNA; snRNA: small nuclear RNAs; snRNP: small nuclear ribonucleoproteins; snoRNA: small nucleolar RNAs; tRNA: transfer RNA; snoRNP: small nucleolar ribonucleoproteins; shRNA: small hairpin RNAs; TEs: transposable elements.

| sncRNA species | Nucleotide length | Targets                         | Complex of action    | Number of species expressed in humans | Number of sncRNAs identified in this study of $n = 9485$ (% of those identified) | Percent of all human sncRNAs identified in this study |
|----------------|-------------------|---------------------------------|----------------------|---------------------------------------|----------------------------------------------------------------------------------|-------------------------------------------------------|
| miRNA          | 19 - 22           | Several mRNAs                   | RISC                 | 2,887 (miRBase)                       | 2,235 (23.6%)                                                                    | 77%                                                   |
| piRNA          | 23 - 36           | TEs, mRNAs                      | piRISC               | 8,592,949 (piRBase)                   | 4,380 (46.2%)                                                                    | 0.05%                                                 |
| 5S / 5.8S rRNA | < 200             | rRNA                            | RISC                 | 435 (RNACentral)                      | 38 (0.4%)                                                                        | 9%                                                    |
| scaRNA         | 120 - 420         | rRNAs (maybe mRNA, tRNA, snRNA) | snoRNP - spliceosome | 51 (GeneCards)                        | 46 (0.5%)                                                                        | 90%                                                   |
| snRNA          | 60 - 450          | Pre-mRNA introns                | snRNP - spliceosome  | 1,957 (GeneCards)                     | 1,655 (17.4%)                                                                    | 85%                                                   |
| snoRNA         | 60 - 300          | rRNAs (maybe mRNA, tRNA, snRNA) | snoRNP - spliceosome | 1,266 (GeneCards)                     | 863 (9.1%)                                                                       | 68%                                                   |
| tRNA           | 76 - 90           | mRNAs, TEs                      | RISC                 | 429 (GtRNAdb)                         | 268 (2.8%)                                                                       | 62%                                                   |

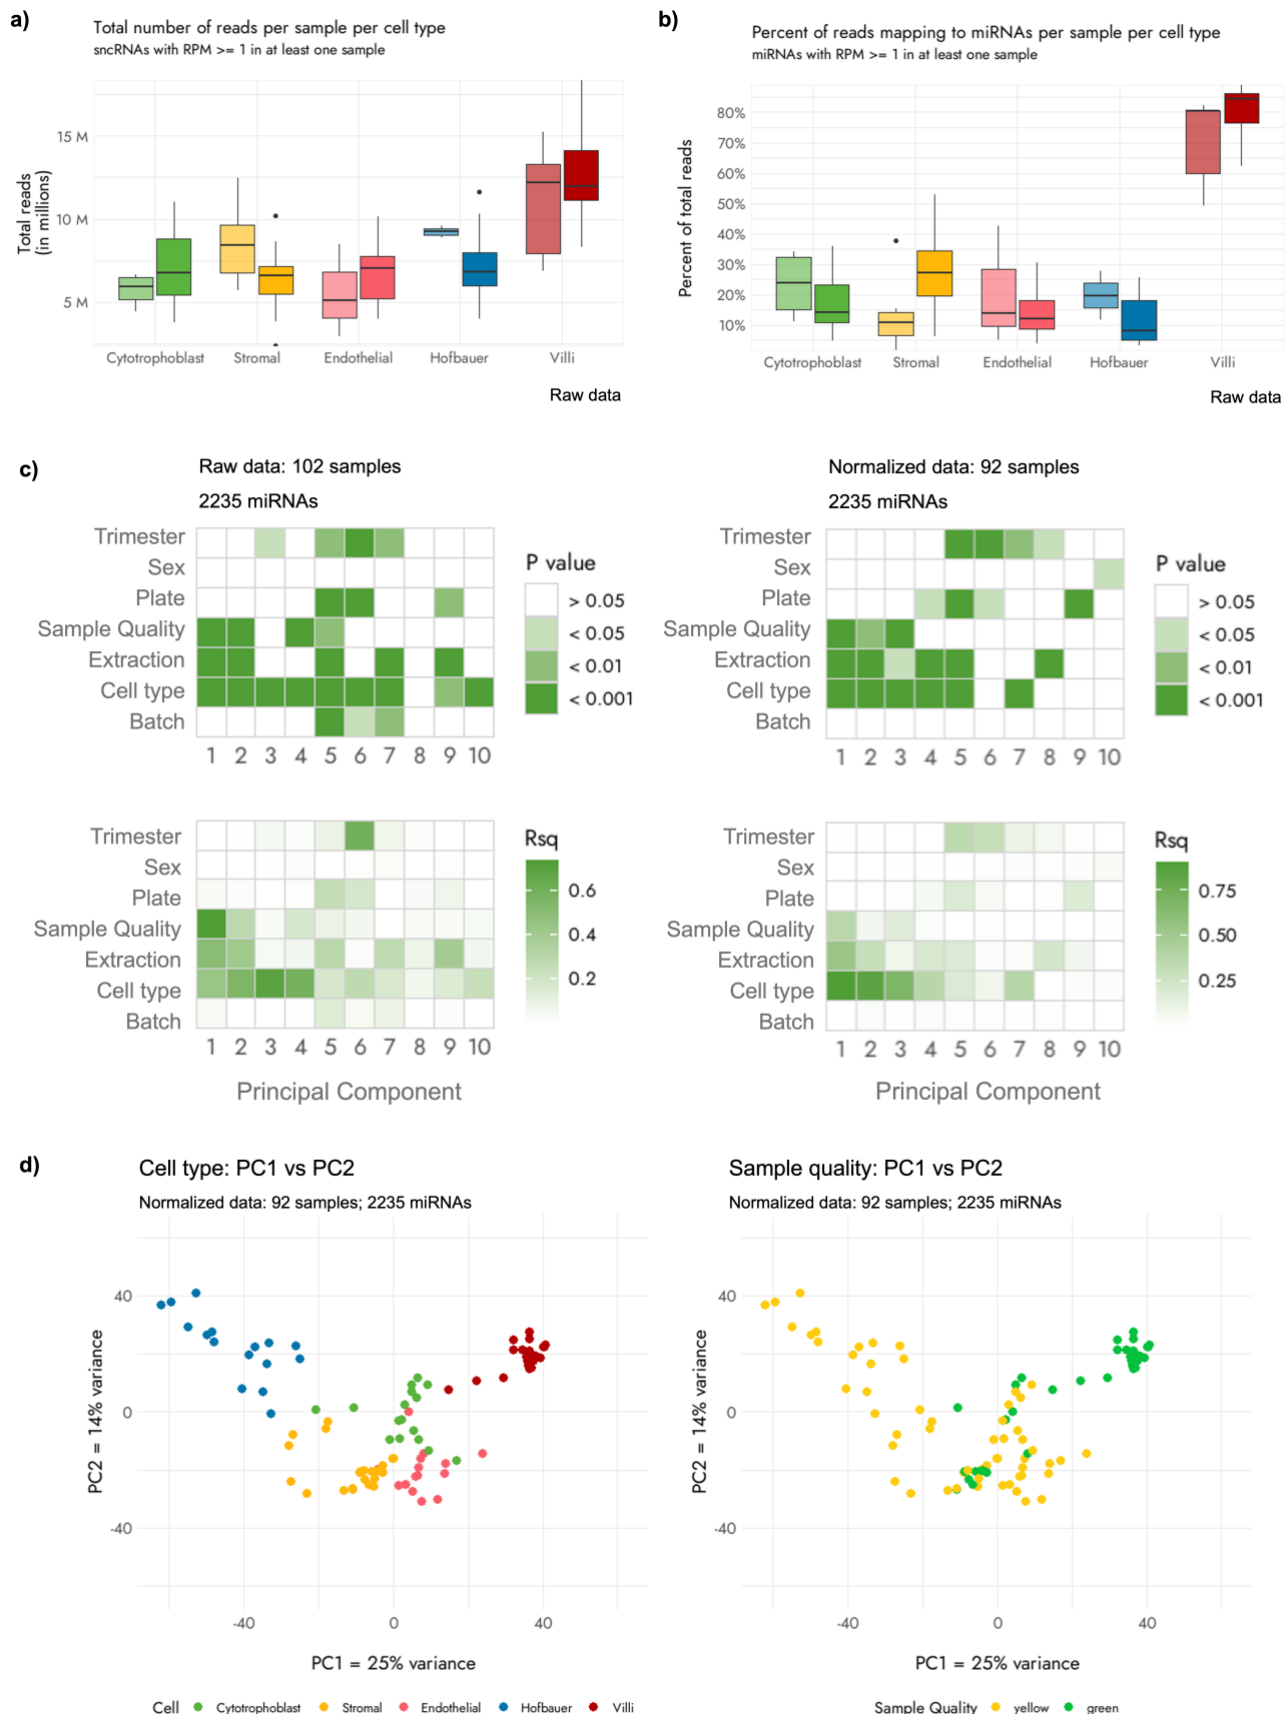

**Supplementary Methods Figure 1:** Read metrics and Principal Component Analysis (PCA) for miRNAs. **a)** Total number of reads (for all sncRNA species [ $n = 9485$ ] and all samples) sequenced. The lighter coloured boxplots on the left are first trimester samples and the darker coloured boxplots are term samples. **b)** Total number of reads mapping to microRNAs ( $n = 2235$ ). **c)** P-value significance and r-squared correlation of variables towards miRNA ( $n = 2235$ ) expression for the first 10 principal components for raw ( $n = 102$  samples) data and after quality control and normalization ( $n = 92$  samples) expression. Sample Quality refers to the combined variable made using total reads sequenced and percentage of reads mapped, as described in Methods. Plate refers to the physical sequencing plate (either Plate 1 or Plate 2), and Batch refers to instance of sample submission for sequencing (either Batch 1 or 2). **d)** PCA of miRNA (2235) expression for variables related to sample quality and cell type for PC1 and PC2 after pre-processing, quality control, and normalization.

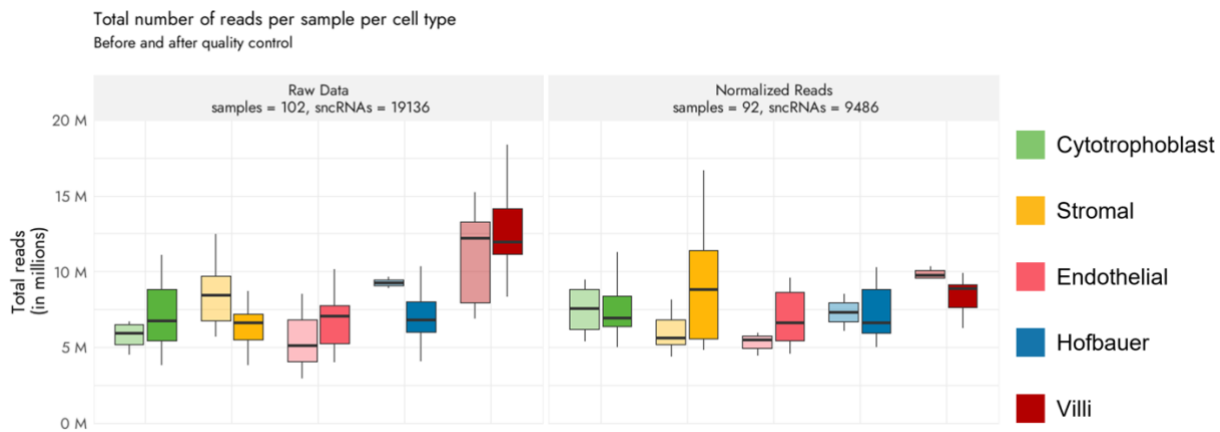

**Supplementary Methods Figure 2:** Total reads of all sorted-cell and whole chorionic villi samples. Number of reads that were sequenced per sample before pre-processing (raw data) and number of reads retained after quality control and normalization. Lighter coloured boxplots on the left are first trimester samples and darker coloured boxplots are term samples.

**Supplementary Methods Table 2:** Sample characteristics and sequencing metrics of all samples (n = 102) that were selected for sequencing. Valid reads = reads which had a length of more than 17 nucleotides. Mapped reads = Valid reads which aligned to the genome based on the alignment criteria (described in Methods). Normalized Reads = Adjusted number of reads (increased or decreased) corrected for by the normalization technique.

| Sample      | Case ID | Gestational age | Original reads | Valid reads | Total reads mapped to genome | Normalized reads  | Sample quality flag |
|-------------|---------|-----------------|----------------|-------------|------------------------------|-------------------|---------------------|
| PL289_endo  | PL289   | 6.6             | 7,310,442      | 4,602,488   | 4,259,142                    | Excluded after QC | green               |
| PL289_strom | PL289   | 6.6             | 12,475,813     | 6,386,959   | 4,371,873                    | 4,356,187         | yellow              |
| PL289_v     | PL289   | 6.6             | 17,299,822     | 15,717,785  | 11,018,167                   | Excluded after QC | red                 |
| PM367_endo  | PM367   | 39.1            | 10,150,676     | 5,254,189   | 4,594,263                    | 4,520,029         | yellow              |
| PM367_troph | PM367   | 39.1            | 11,513,839     | 7,728,913   | 6,094,248                    | Excluded after QC | red                 |
| PM367_strom | PM367   | 39.1            | 5,789,625      | 3,346,094   | 3,187,489                    | 5,360,729         | green               |
| PM367_hofb  | PM367   | 39.1            | 11,652,924     | 6,370,755   | 5,836,249                    | 6,483,768         | yellow              |
| PM367_vc    | PM367   | 39.1            | 17,805,397     | 12,347,937  | 12,129,379                   | 6,218,236         | green               |
| PL292_strom | PL292   | 7.1             | 9,381,539      | 4,913,735   | 4,314,259                    | 5,322,644         | yellow              |
| PL292_v     | PL292   | 7.1             | 15,252,678     | 7,940,964   | 7,724,970                    | 5,682,366         | green               |
| PL281_hofb  | PL281   | 9               | 7,981,703      | 5,129,029   | 4,622,794                    | Excluded after QC | green               |
| PL281_strom | PL281   | 9               | 6,152,121      | 3,580,982   | 2,278,221                    | Excluded after QC | yellow              |
| PL281_v     | PL281   | 9               | 8,859,396      | 1,859,447   | 1,798,643                    | Excluded after QC | green               |
| PL290_endo  | PL290   | 10.7            | 2,944,820      | 2,039,875   | 1,159,261                    | 4,404,379         | yellow              |
| PL290_troph | PL290   | 10.7            | 5,386,050      | 3,409,661   | 3,185,987                    | 5,366,662         | yellow              |
| PL290_strom | PL290   | 10.7            | 5,699,330      | 3,873,989   | 2,881,473                    | 5,618,481         | yellow              |
| PL290_v     | PL290   | 10.7            | 13,289,913     | 6,458,828   | 6,343,215                    | 9,549,301         | green               |
| PL294_endo  | PL294   | 11.9            | 5,123,044      | 4,105,779   | 3,725,173                    | 5,503,336         | green               |
| PL294_hofb  | PL294   | 11.9            | 8,881,679      | 6,294,789   | 5,967,460                    | 6,042,503         | yellow              |

|             |       |      |            |            |           |                      |        |
|-------------|-------|------|------------|------------|-----------|----------------------|--------|
| PL294_strom | PL294 | 11.9 | 9,957,207  | 7,457,374  | 6,948,035 | 5,080,046            | yellow |
| PL294_v     | PL294 | 11.9 | 7,935,918  | 6,629,296  | 6,533,834 | 10,104,011           | green  |
| PL295_endo  | PL295 | 11.9 | 6,805,750  | 5,018,217  | 4,726,659 | Excluded<br>after QC | yellow |
| PL295_hofb  | PL295 | 11.9 | 9,615,382  | 6,952,994  | 6,591,438 | 8,533,360            | yellow |
| PL295_troph | PL295 | 11.9 | 4,465,211  | 3,163,081  | 3,051,424 | 9,474,538            | green  |
| PL295_strom | PL295 | 11.9 | 7,006,115  | 4,533,009  | 4,232,017 | 8,120,028            | yellow |
| PL295_vc    | PL295 | 11.9 | 6,881,621  | 6,161,227  | 6,083,596 | 10,352,538           | green  |
| PL296_strom | PL296 | 11.5 | 6,539,043  | 5,233,594  | 4,865,149 | 6,447,332            | yellow |
| PL296_v     | PL296 | 11.5 | 12,197,705 | 10,111,209 | 9,976,730 | 9,779,851            | green  |
| P128_endo   | P128  | 12.3 | 8,493,656  | 5,094,075  | 4,013,622 | 5,938,388            | yellow |
| P128_troph  | P128  | 12.3 | 6,451,585  | 4,637,884  | 4,086,903 | 6,490,982            | green  |
| P128_strom  | P128  | 12.3 | 8,411,518  | 6,040,633  | 5,583,961 | 7,179,924            | green  |
| P131_strom  | P131  | 13   | 16,172     | 9,253      | 7,771     | Excluded<br>after QC | red    |
| P131_troph  | P131  | 13   | 6,658,774  | 4,332,187  | 3,995,143 | 8,639,881            | yellow |
| PM359_hofb  | PM359 | 39.9 | 4,025,590  | 3,034,275  | 2,412,552 | 5,541,321            | yellow |
| PM359_troph | PM359 | 39.9 | 2,003,028  | 1,380,950  | 562,185   | Excluded<br>after QC | red    |
| PM359_strom | PM359 | 39.9 | 6,436,908  | 4,437,147  | 3,642,898 | 5,659,992            | yellow |
| PM359_vc    | PM359 | 39.9 | 18,331,501 | 7,318,903  | 7,179,112 | 6,933,433            | green  |
| PM364_endo  | PM364 | 39.3 | 6,927,834  | 5,303,712  | 4,930,331 | 4,851,748            | yellow |
| PM364_troph | PM364 | 39.3 | 4,269,979  | 3,087,536  | 2,210,676 | 4,977,494            | yellow |
| PM364_strom | PM364 | 39.3 | 4,871,489  | 3,879,050  | 3,671,521 | 4,939,998            | yellow |
| PM364_vc    | PM364 | 39.3 | 12,523,737 | 7,340,460  | 7,268,523 | 6,751,345            | green  |
| PM366_endo  | PM366 | 39   | 5,313,724  | 4,090,259  | 3,637,058 | 5,346,974            | yellow |
| PM366_hofb  | PM366 | 39   | 10,334,298 | 6,528,740  | 6,058,671 | 5,017,060            | yellow |
| PM366_troph | PM366 | 39   | 9,091,839  | 6,593,851  | 5,839,514 | 5,005,449            | yellow |
| PM366_strom | PM366 | 39   | 4,979,070  | 3,845,149  | 3,734,409 | 5,823,129            | yellow |
| PM366_vc    | PM366 | 39   | 16,534,580 | 8,326,473  | 8,225,723 | 6,944,638            | green  |
| PM368_endo  | PM368 | 38.7 | 7,173,553  | 5,585,657  | 5,359,996 | 8,492,282            | green  |
| PM368_troph | PM368 | 38.7 | 3,789,263  | 2,642,338  | 2,446,012 | 11,293,075           | yellow |
| PM368_strom | PM368 | 38.7 | 8,843      | 4,412      | 3,410     | Excluded<br>after QC | red    |
| PM368_vc    | PM368 | 38.7 | 8,564,839  | 7,815,155  | 7,772,953 | 8,479,146            | green  |
| PM369_strom | PM369 | 39.6 | 6,989,066  | 5,123,693  | 4,610,299 | 4,830,327            | yellow |
| PM369_vc    | PM369 | 39.6 | 11,370,019 | 9,362,410  | 9,275,340 | 9,123,476            | green  |
| PM370_endo  | PM370 | 39   | 5,032,466  | 3,600,628  | 2,796,968 | 21,401,994           | yellow |
| PM370_hofb  | PM370 | 39   | 5,614,050  | 3,901,888  | 3,543,304 | 40,558,748           | yellow |
| PM370_troph | PM370 | 39   | 8,745,640  | 6,550,601  | 6,100,575 | 8,172,723            | green  |
| PM370_strom | PM370 | 39   | 6,909,645  | 4,933,872  | 4,523,867 | 10,628,811           | yellow |

|             |       |      |            |            |            |            |        |
|-------------|-------|------|------------|------------|------------|------------|--------|
| PM370_vc    | PM370 | 39   | 10,477,925 | 8,715,471  | 8,604,785  | 9,094,391  | green  |
| PM371_endo  | PM371 | 36.4 | 4,609,941  | 3,367,823  | 3,005,108  | 9,551,838  | yellow |
| PM371_hofb  | PM371 | 36.4 | 5,964,830  | 5,194,297  | 4,837,449  | 8,694,422  | yellow |
| PM371_troph | PM371 | 36.4 | 11,057,665 | 8,304,190  | 7,629,059  | 9,223,922  | green  |
| PM371_strom | PM371 | 36.4 | 2,378,385  | 1,476,979  | 1,153,373  | 12,696,265 | yellow |
| PM371_vc    | PM371 | 36.4 | 13,835,413 | 10,789,711 | 10,688,288 | 7,631,261  | green  |
| PM372_endo  | PM372 | 39.6 | 8,546,252  | 5,171,925  | 4,427,685  | 5,849,557  | yellow |
| PM372_hofb  | PM372 | 39.6 | 6,112,215  | 5,177,853  | 4,959,348  | 6,505,362  | yellow |
| PM372_troph | PM372 | 39.6 | 5,535,731  | 3,843,271  | 3,241,030  | 6,955,929  | yellow |
| PM372_strom | PM372 | 39.6 | 6,688,313  | 5,615,325  | 5,410,366  | 10,383,118 | green  |
| PM372_vc    | PM372 | 39.6 | 9,150,153  | 7,487,433  | 7,424,539  | 8,994,745  | green  |
| PM373_endo  | PM373 | 39.3 | 9,481,361  | 6,670,238  | 5,760,418  | 5,553,997  | yellow |
| PM373_hofb  | PM373 | 39.3 | 7,165,309  | 4,849,249  | 4,311,952  | 6,077,210  | yellow |
| PM373_troph | PM373 | 39.3 | 10,450,756 | 7,883,386  | 7,405,653  | 6,468,183  | yellow |
| PM373_strom | PM373 | 39.3 | 7,701,305  | 6,583,156  | 6,338,921  | 8,172,071  | green  |
| PM373_vc    | PM373 | 39.3 | 14,135,443 | 10,557,633 | 10,476,339 | 8,865,716  | green  |
| PM374_endo  | PM374 | 39.3 | 7,516,286  | 5,111,033  | 4,526,331  | 7,836,284  | yellow |
| PM374_hofb  | PM374 | 39.3 | 5,166,485  | 3,549,132  | 3,016,407  | 22,388,924 | yellow |
| PM374_troph | PM374 | 39.3 | 5,884,808  | 4,470,155  | 4,045,937  | 7,180,186  | yellow |
| PM374_strom | PM374 | 39.3 | 8,678,909  | 6,626,347  | 6,220,152  | 10,921,949 | green  |
| PM374_vc    | PM374 | 39.3 | 15,421,805 | 13,004,515 | 12,880,972 | 8,226,840  | green  |
| PM375_endo  | PM375 | 39.3 | 7,316,546  | 5,592,700  | 5,168,773  | 6,631,397  | yellow |
| PM375_hofb  | PM375 | 39.3 | 6,530,707  | 5,354,164  | 4,843,912  | 5,021,846  | yellow |
| PM375_troph | PM375 | 39.3 | 8,325,037  | 6,361,001  | 6,021,960  | 8,951,016  | yellow |
| PM375_strom | PM375 | 39.3 | 10,209,722 | 7,008,512  | 6,605,523  | 8,647,628  | yellow |
| PM375_vc    | PM375 | 39.3 | 11,154,673 | 9,606,888  | 9,540,600  | 8,493,949  | green  |
| PM376_endo  | PM376 | 39.1 | 3,978,482  | 2,829,920  | 2,628,430  | 19,119,192 | yellow |
| PM376_hofb  | PM376 | 39.1 | 6,815,165  | 4,941,789  | 3,900,554  | 10,269,915 | yellow |
| PM376_troph | PM376 | 39.1 | 7,648,664  | 5,772,369  | 5,361,954  | 5,977,325  | yellow |
| PM376_strom | PM376 | 39.1 | 3,810,950  | 2,534,158  | 2,172,027  | 9,046,877  | yellow |
| PM376_vc    | PM376 | 39.1 | 11,722,277 | 9,654,090  | 9,582,650  | 9,396,202  | green  |
| PM377_hofb  | PM377 | 39.6 | 8,237,808  | 6,187,672  | 5,722,359  | 6,791,315  | yellow |
| PM377_troph | PM377 | 39.6 | 5,775,116  | 4,983,467  | 4,620,671  | 6,912,233  | yellow |
| PM377_strom | PM377 | 39.6 | 5,673,384  | 4,589,807  | 4,189,117  | 5,358,957  | yellow |
| PM377_vc    | PM377 | 39.6 | 11,975,444 | 9,998,681  | 9,917,692  | 9,869,151  | green  |
| PM378_endo  | PM378 | 39.1 | 5,968,924  | 4,224,369  | 3,740,679  | 8,725,499  | yellow |
| PM378_hofb  | PM378 | 39.1 | 7,195,880  | 5,966,263  | 5,631,556  | 8,461,217  | yellow |

|             |       |      |            |            |            |            |        |
|-------------|-------|------|------------|------------|------------|------------|--------|
| PM378_strom | PM378 | 39.1 | 6,574,558  | 5,447,999  | 5,181,047  | 14,506,438 | green  |
| PM378_vc    | PM378 | 39.1 | 12,452,895 | 10,746,327 | 10,685,073 | 8,882,254  | green  |
| PM379_hofb  | PM379 | 39.3 | 6,851,351  | 4,740,931  | 4,395,791  | 10,013,253 | yellow |
| PM379_strom | PM379 | 39.3 | 8,122,631  | 7,512,541  | 7,376,564  | 15,056,518 | green  |
| PM379_vc    | PM379 | 39.3 | 8,326,658  | 7,324,804  | 7,246,429  | 9,653,642  | green  |
| PM381_hofb  | PM381 | 40.4 | 9,881,192  | 7,549,014  | 7,189,681  | 9,178,888  | yellow |
| PM381_troph | PM381 | 40.4 | 5,232,368  | 4,074,077  | 3,671,151  | 6,752,808  | yellow |
| PM381_strom | PM381 | 40.4 | 6,693,696  | 5,488,500  | 4,641,624  | 16,675,624 | green  |
| PM381_vc    | PM381 | 40.4 | 11,522,934 | 9,973,673  | 9,910,839  | 11,746,192 | green  |

PCA for raw data was conducted for each sncRNA species independently to assess sample variability, and highlighted that sample/cell type (villi and sorted-cells), sample quality, and extraction type contributed significantly to PC1 (observed for all sncRNA species), with sample quality being most highly correlated with sncRNA expression for the raw data; **Supplementary Methods Figure 1c** depicts the PCA for miRNAs only, as an example. Samples also showed grouping by these three variables for PC1 against PC2 (**Supplementary Methods Figure 3**). This variation also held true when PCA was performed separately for each sncRNA species and underscores the importance of accounting for technical variables in any bioinformatic analyses. As the overall expression profile for each species differs significantly, reads were normalized for each sncRNA species independently and then combined - i.e., after retaining sncRNAs with expression of at least 1 read in at least one sample, sncRNAs were subset by species (miRNAs, piRNAs, rRNAs, scaRNAs, snoRNAs, snRNAs, tRNAs) and normalized using the RLE method and then scaled per million (detailed in Methods). After normalization, PCA was re-run, and in the normalized data, samples clustered prominently by cell type along PC1 and PC2 (**Supplementary Methods Figure 1c and 1d**). We saw that sample quality was no longer the variable most strongly associated with PC1 and PC2 after normalization and preprocessing, demonstrating that those steps are important to reduce technical variation between samples.

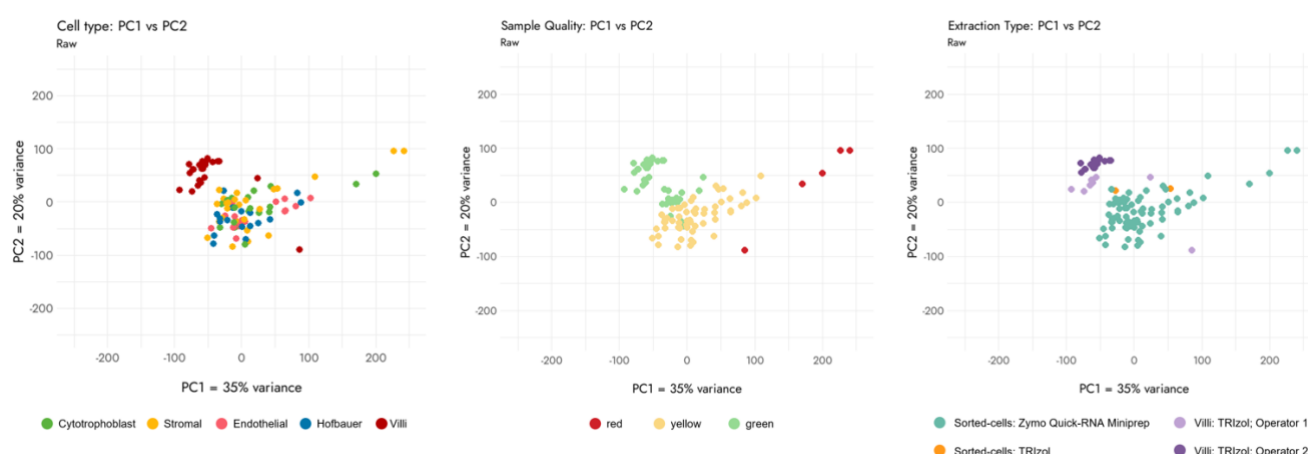

**Supplementary Methods Figure 3:** PC1 vs PC2 for raw data. PCA for miRNA expression (n = 2235) for raw data (102 samples). Samples showed clustering primarily by sample quality, followed by cell type, and then extraction type.

**SF1: Distribution of sequence read length.** Read length (in nucleotides) of raw data (all 102 samples and all 19136 sncRNAs) after trimming to remove adaptors and index primers.

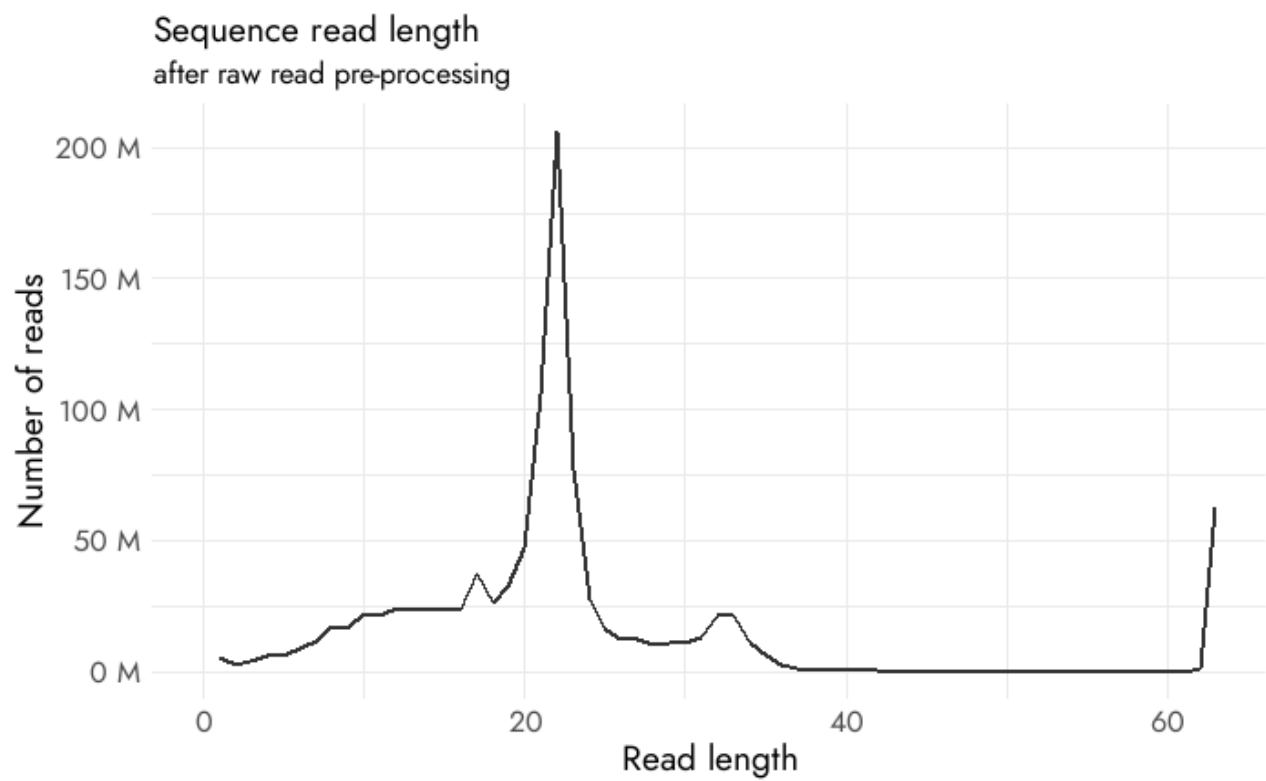

**SF2: sncRNAs with high expression (RPM >= 1000) in all cell types and bulk villi (n = 133).** **a)** Expression of all 133 sncRNAs by species (miRNA, piRNA, rRNA, scaRNA, snoRNA, snRNA, tRNA). The dots represent the mean, and the vertical lines on either side of the dot represent the standard deviation. **b)** Hierarchical clustering of expression Z-scores of the 16 miRNAs with RPM >= 1000 in all cell types and matched villi.

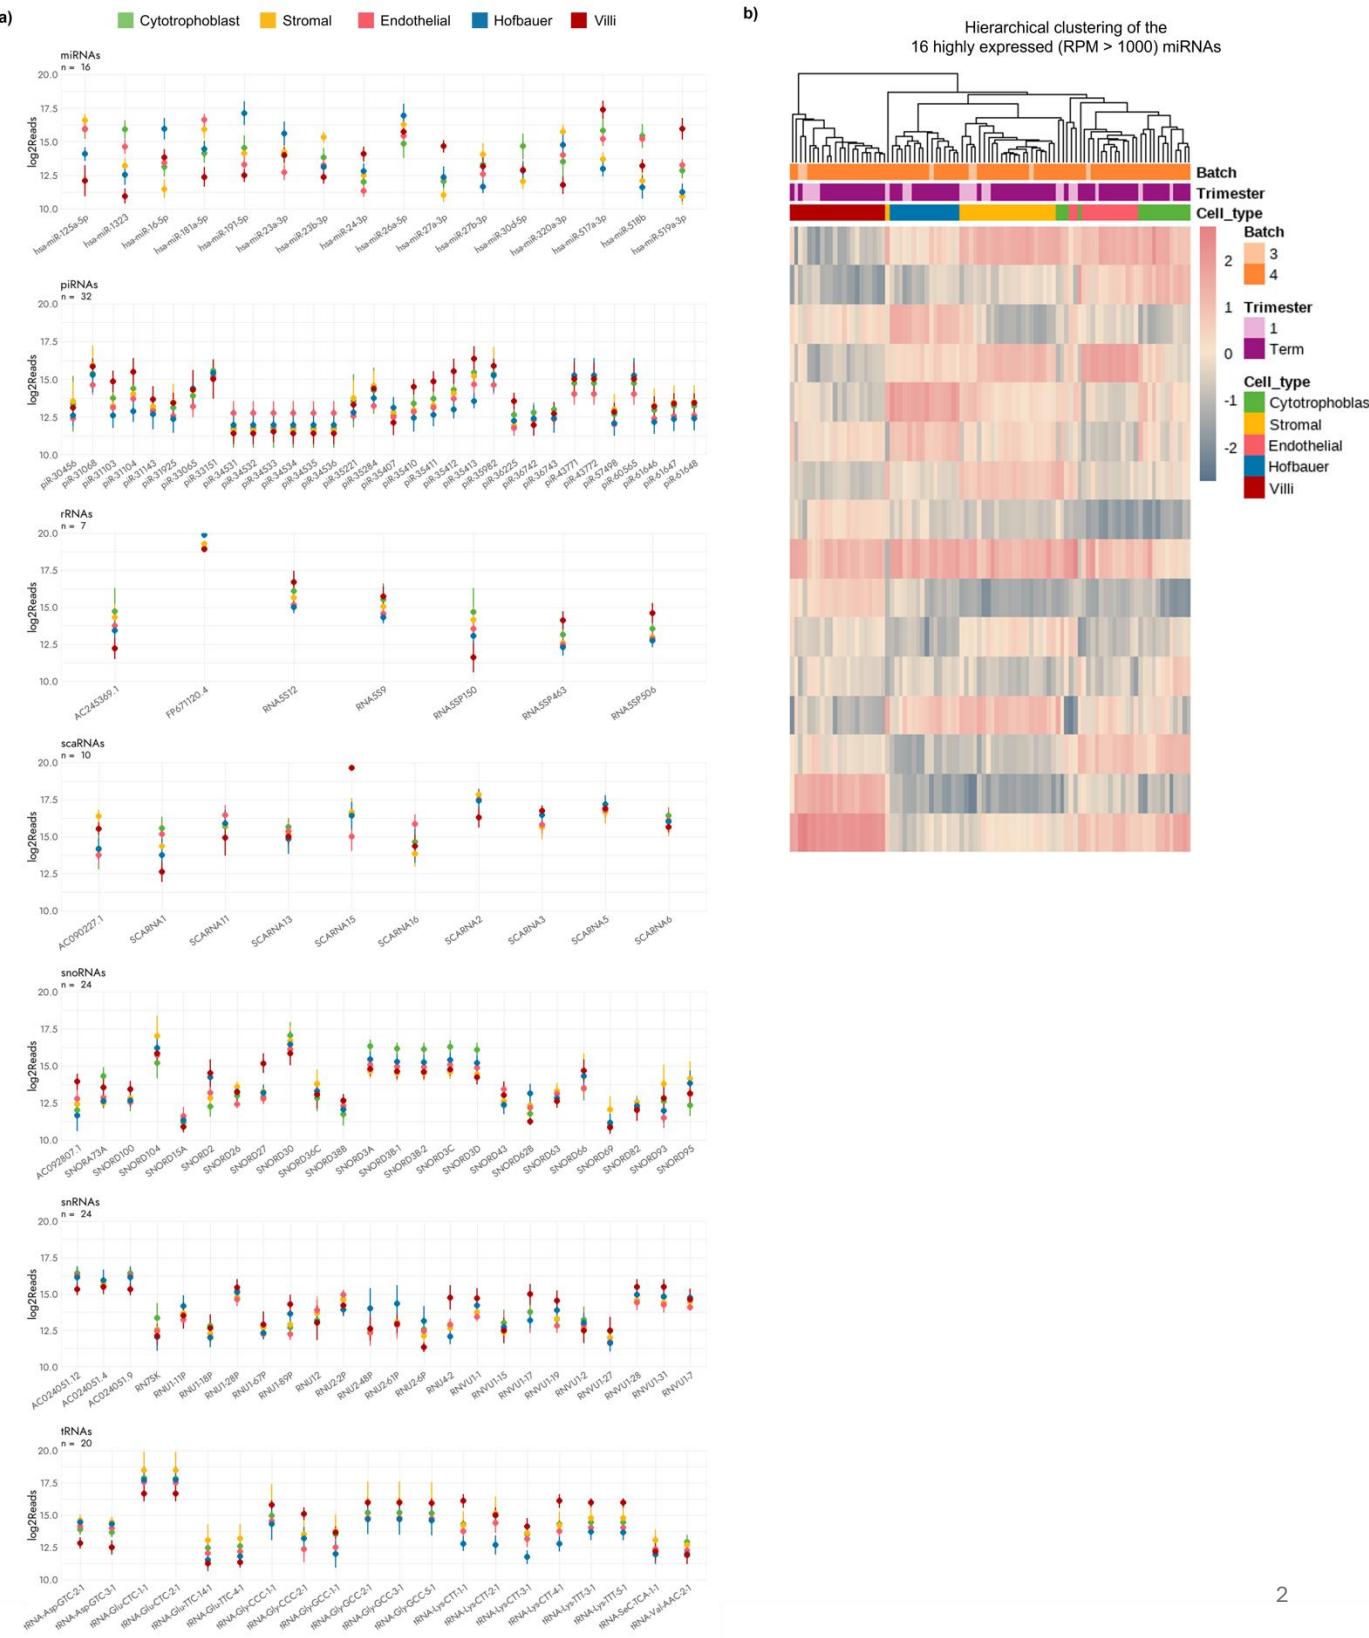



**SF3: Expression of cytotrophoblast cell-associated miRNAs in The Cancer Genome Atlas (TCGA) cohorts.** Expression of each of the 10 cytotrophoblast cell-associated miRNAs in some of the TCGA cohorts.

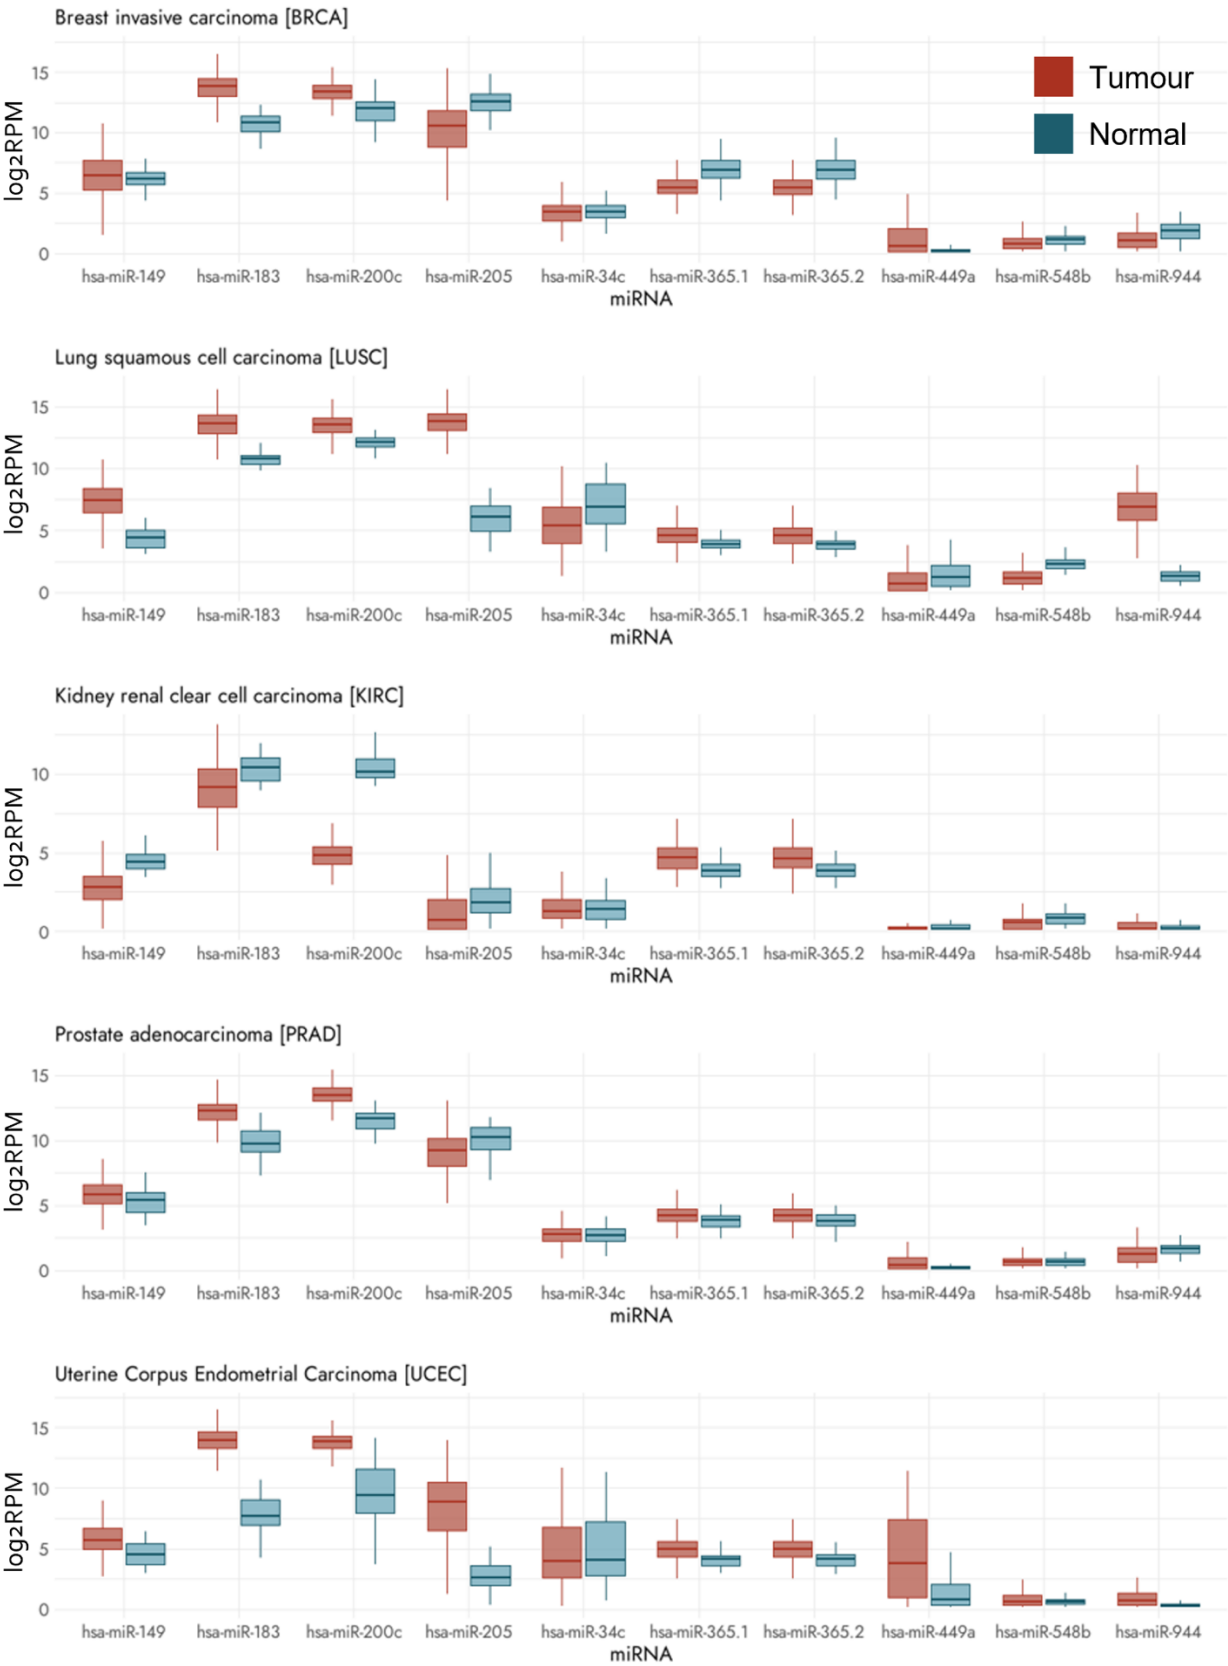

**SF4: Expression-methylation correlation for sncRNA-CpG pairs. a)** sncRNAs and CpGs (CpGs within +/-10Kb of that sncRNA) which showed a correlation ( $R^2$ ) greater than  $\pm 0.6$  in term sorted-cell placental samples (x-axis = DNA methylation beta values; y-axis = sncRNA expression for log-2 transformed normalized expression counts). Genomic location of both the sncRNA and CpG are also provided. **b)** The one miRNA-CpG pair that showed high correlation (FDR = 0.65) in term bulk villi samples. **c)** The one miRNA-CpG pair that showed high correlation (FDR = 0.00) when C14MC and C19MC analysed separately.

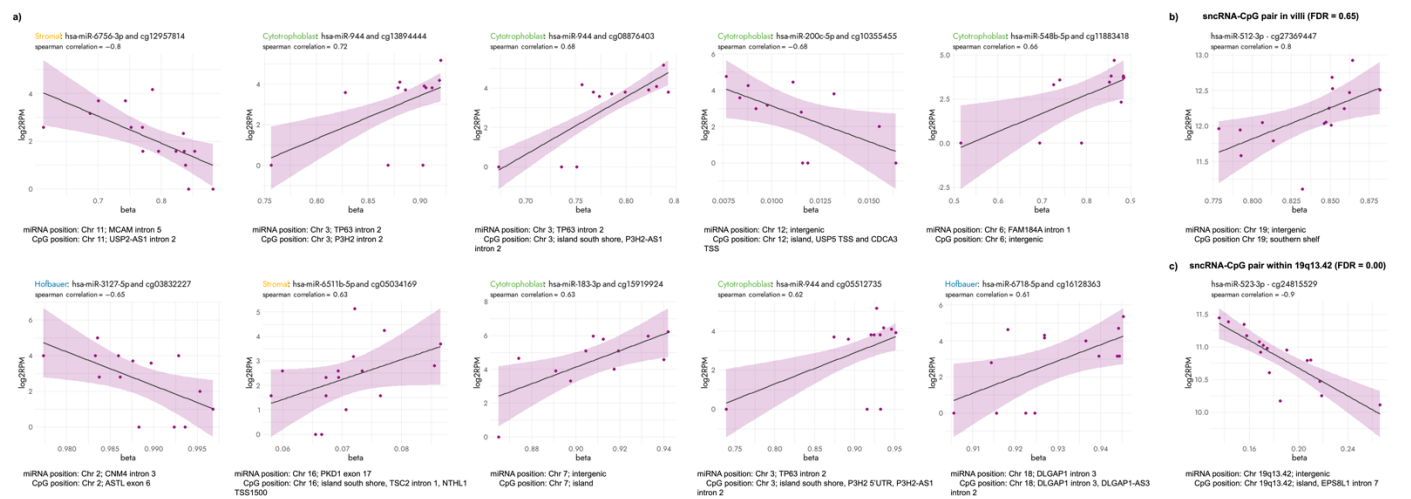

**SF5. Gene set enrichment for all cell type-associated sncRNAs.** Significant gene sets for **a)** stromal cell-associated **b)** Hofbauer cell-associated **c)** endothelial cell-associated sncRNAs

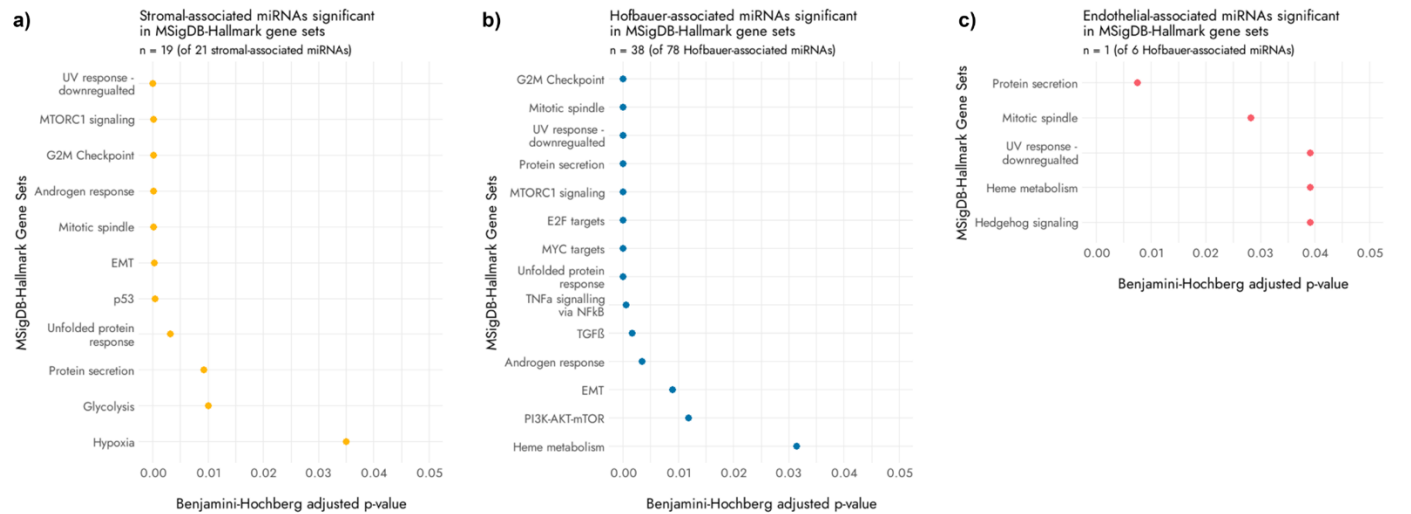

Supplement: Supplementary file 1 [file 6891a4995ec4feb0fd4c4bbc.pdf]
