# Supplementary material for: Profiling the cell-specific small non-coding RNA transcriptome of the human placenta
Source: Research Square preprint supplement (doi:10.21203/rs.3.rs-5953518/v1), 2025-02-12
Supplement: Supplementary file 1 [file 838853083ac9c55b9a121c38.xlsx]

## Sheet: ST1
ST1: Placental highly-expressed sncRNAs (RPM >= 1000) in all cell types and whole chorionic villi (n = 133)
sncRNA	type
hsa-miR-125a-5p	miRNA
hsa-miR-1323	miRNA
hsa-miR-16-5p	miRNA
hsa-miR-181a-5p	miRNA
hsa-miR-191-5p	miRNA
hsa-miR-23a-3p	miRNA
hsa-miR-23b-3p	miRNA
hsa-miR-24-3p	miRNA
hsa-miR-26a-5p	miRNA
hsa-miR-27a-3p	miRNA
hsa-miR-27b-3p	miRNA
hsa-miR-30d-5p	miRNA
hsa-miR-320a-3p	miRNA
hsa-miR-518b	miRNA
hsa-miR-519a-3p	miRNA
hsa-miR-517a-3p	miRNA
piR-36743	piRNA
piR-35413	piRNA
piR-34531	piRNA
piR-36742	piRNA
piR-35284	piRNA
piR-61648	piRNA
piR-31103	piRNA
piR-61646	piRNA
piR-57498	piRNA
piR-35410	piRNA
piR-34534	piRNA
piR-30456	piRNA
piR-61647	piRNA
piR-35412	piRNA
piR-60565	piRNA
piR-35407	piRNA
piR-35411	piRNA
piR-34532	piRNA
piR-35221	piRNA
piR-31068	piRNA
piR-33065	piRNA
piR-36225	piRNA
piR-31925	piRNA
piR-34533	piRNA
piR-34535	piRNA
piR-43772	piRNA
piR-34536	piRNA
piR-31143	piRNA
piR-43771	piRNA
piR-33151	piRNA
piR-35982	piRNA
piR-31104	piRNA
RNA5S12	rRNA
FP671120.4	rRNA
RNA5SP150	rRNA
RNA5SP463	rRNA
RNA5S9	rRNA
RNA5SP506	rRNA
AC245369.1	rRNA
SCARNA2	scaRNA
SCARNA16	scaRNA
SCARNA11	scaRNA
AC090227.1	scaRNA
SCARNA13	scaRNA
SCARNA15	scaRNA
SCARNA3	scaRNA
SCARNA1	scaRNA
SCARNA6	scaRNA
SCARNA5	scaRNA
SNORD104	snoRNA
AC092807.1	snoRNA
SNORD27	snoRNA
SNORD3B-2	snoRNA
SNORA73A	snoRNA
SNORD82	snoRNA
SNORD26	snoRNA
SNORD15A	snoRNA
SNORD63	snoRNA
SNORD38B	snoRNA
SNORD30	snoRNA
SNORD66	snoRNA
SNORD69	snoRNA
SNORD100	snoRNA
SNORD93	snoRNA
SNORD2	snoRNA
SNORD36C	snoRNA
SNORD3B-1	snoRNA
SNORD95	snoRNA
SNORD3C	snoRNA
SNORD43	snoRNA
SNORD3A	snoRNA
SNORD3D	snoRNA
SNORD62B	snoRNA
RNU12	snRNA
RNU1-18P	snRNA
RNU4-2	snRNA
RNVU1-7	snRNA
RNU1-11P	snRNA
RNU1-67P	snRNA
RNVU1-15	snRNA
RNVU1-2	snRNA
RNU1-89P	snRNA
RNVU1-1	snRNA
RNVU1-17	snRNA
RNU2-2P	snRNA
RNU2-48P	snRNA
RNU2-61P	snRNA
RNU2-6P	snRNA
RNVU1-31	snRNA
RNVU1-19	snRNA
AC024051.12	snRNA
AC024051.4	snRNA
RNVU1-27	snRNA
RN7SK	snRNA
RNVU1-28	snRNA
RNU1-28P	snRNA
AC024051.9	snRNA
tRNA-Asp-GTC-3-1	tRNA
tRNA-Glu-CTC-2-1	tRNA
tRNA-Glu-TTC-14-1	tRNA
tRNA-Gly-GCC-3-1	tRNA
tRNA-Gly-GCC-5-1	tRNA
tRNA-Lys-CTT-3-1	tRNA
tRNA-Lys-CTT-4-1	tRNA
tRNA-Lys-TTT-5-1	tRNA
tRNA-SeC-TCA-1-1	tRNA
tRNA-Val-AAC-2-1	tRNA
tRNA-Glu-TTC-4-1	tRNA
tRNA-Lys-CTT-2-1	tRNA
tRNA-Gly-GCC-1-1	tRNA
tRNA-Lys-CTT-1-1	tRNA
tRNA-Gly-CCC-2-1	tRNA
tRNA-Gly-CCC-1-1	tRNA
tRNA-Asp-GTC-2-1	tRNA
tRNA-Gly-GCC-2-1	tRNA
tRNA-Lys-TTT-3-1	tRNA
tRNA-Glu-CTC-1-1	tRNA

## Sheet: ST2
ST2: Pathways predicted for the 16 consistently highly-expressed miRNAs in all cell types. miRNAs with RPM >= 1000 in all cell types.
KEGG pathway	BH p-value	miRNAs
Fatty acid biosynthesis	5.3e-11	12
Proteoglycans in cancer	1.2e-07	18
Hippo signaling pathway	3.47e-06	19
Pathways in cancer	4.42e-06	19
Axon guidance	4.65e-06	17
Glioma	1.05e-05	18
Rap1 signaling pathway	1.7e-05	18
Signaling pathways regulating pluripotency of stem cells	1.7e-05	19
ErbB signaling pathway	3.72e-05	17
Neurotrophin signaling pathway	3.79e-05	19
Ras signaling pathway	6.95e-05	18
Wnt signaling pathway	8.89e-05	18
Focal adhesion	0.00011	18
PI3K-Akt signaling pathway	0.00022	18
Prostate cancer	0.000267	17
Adrenergic signaling in cardiomyocytes	0.000715	18
Glutamatergic synapse	0.000715	18
MAPK signaling pathway	0.000715	19
Long-term potentiation	0.001182	18
Long-term depression	0.001413	18
Endocytosis	0.00167	17
Regulation of actin cytoskeleton	0.00167	17
Transcriptional misregulation in cancer	0.00167	19
TGF-beta signaling pathway	0.002408	18
Glycosaminoglycan biosynthesis - keratan sulfate	0.002526	9
N-Glycan biosynthesis	0.002526	16
Platelet activation	0.003186	18
Gap junction	0.003186	19
mTOR signaling pathway	0.003361	17
Pancreatic cancer	0.003361	17
Lysine degradation	0.00343	18
Melanoma	0.003493	17
Oocyte meiosis	0.003493	18
cAMP signaling pathway	0.004894	18
FoxO signaling pathway	0.005276	17
Non-small cell lung cancer	0.005701	17
Oxytocin signaling pathway	0.005718	18
Viral carcinogenesis	0.005944	18
Estrogen signaling pathway	0.008	18
Thyroid hormone signaling pathway	0.008399	19
Acute myeloid leukemia	0.009023	16
Choline metabolism in cancer	0.009029	17
Hepatitis B	0.009186	18
Chronic myeloid leukemia	0.010861	16
Dorso-ventral axis formation	0.013224	16
Vascular smooth muscle contraction	0.015049	18
cGMP-PKG signaling pathway	0.018808	18
Sphingolipid signaling pathway	0.020531	18
Adherens junction	0.020807	18
B cell receptor signaling pathway	0.023359	17
Fc epsilon RI signaling pathway	0.023999	17
Colorectal cancer	0.023999	17
T cell receptor signaling pathway	0.025344	17
Renal cell carcinoma	0.027564	18
Prolactin signaling pathway	0.030083	18
Osteoclast differentiation	0.032643	17
ECM-receptor interaction	0.039426	17
Small cell lung cancer	0.04669	17
mRNA surveillance pathway	0.048638	20

## Sheet: ST3
ST3: List of the 115 placental cell type-associated sncRNAs.
sncRNA	Species	Associated in cell type	Chromosome	Previously Published?
hsa-miR-149-3p	miRNA	Cytotrophoblast	2	Yes
hsa-miR-183-3p	miRNA	Cytotrophoblast	7	Yes
hsa-miR-200c-5p	miRNA	Cytotrophoblast	12	Yes
hsa-miR-205-3p	miRNA	Cytotrophoblast	1	Yes
hsa-miR-34c-3p	miRNA	Cytotrophoblast	11	Yes
hsa-miR-365a-5p	miRNA	Cytotrophoblast	16	Yes
hsa-miR-449a	miRNA	Cytotrophoblast	5	Yes
hsa-miR-4775	miRNA	Cytotrophoblast	2	No
hsa-miR-548b-5p	miRNA	Cytotrophoblast	6	No
hsa-miR-944	miRNA	Cytotrophoblast	3	No
hsa-miR-150-3p	miRNA	Endothelial	19	Yes
AC093523.1	snoRNA	Endothelial	5	No
RNU2-18P	snRNA	Endothelial	10	No
RNU6-144P	snRNA	Endothelial	8	No
RNU6-169P	snRNA	Endothelial	2	No
RNU6-552P	snRNA	Endothelial	14	No
hsa-let-7f-1-3p	miRNA	Hofbauer	9	Yes
hsa-miR-1249-5p	miRNA	Hofbauer	22	No
hsa-miR-1273h-3p	miRNA	Hofbauer	16	No
hsa-miR-1273h-5p	miRNA	Hofbauer	16	No
hsa-miR-1277-5p	miRNA	Hofbauer	X	No
hsa-miR-1304-3p	miRNA	Hofbauer	11	No
hsa-miR-1306-3p	miRNA	Hofbauer	22	No
hsa-miR-1468-5p	miRNA	Hofbauer	X	No
hsa-miR-146b-3p	miRNA	Hofbauer	10	Yes
hsa-miR-190b-5p	miRNA	Hofbauer	1	Yes
hsa-miR-197-5p	miRNA	Hofbauer	1	Yes
hsa-miR-1976	miRNA	Hofbauer	1	No
hsa-miR-20b-3p	miRNA	Hofbauer	X	Yes
hsa-miR-210-5p	miRNA	Hofbauer	11	Yes
hsa-miR-212-5p	miRNA	Hofbauer	17	Yes
hsa-miR-3074-5p	miRNA	Hofbauer	9	Yes
hsa-miR-3127-5p	miRNA	Hofbauer	2	Yes
hsa-miR-3130-3p	miRNA	Hofbauer	2	No
hsa-miR-3177-3p	miRNA	Hofbauer	16	No
hsa-miR-33b-3p	miRNA	Hofbauer	17	Yes
hsa-miR-340-3p	miRNA	Hofbauer	5	Yes
hsa-miR-3614-5p	miRNA	Hofbauer	17	No
hsa-miR-363-5p	miRNA	Hofbauer	X	Yes
hsa-miR-371b-3p	miRNA	Hofbauer	19	No
hsa-miR-371b-5p	miRNA	Hofbauer	19	No
hsa-miR-378e	miRNA	Hofbauer	5	No
hsa-miR-378g	miRNA	Hofbauer	1	No
hsa-miR-4662b	miRNA	Hofbauer	8	No
hsa-miR-4677-3p	miRNA	Hofbauer	1	No
hsa-miR-4683	miRNA	Hofbauer	10	No
hsa-miR-4687-5p	miRNA	Hofbauer	11	No
hsa-miR-4787-3p	miRNA	Hofbauer	3	No
hsa-miR-486-3p	miRNA	Hofbauer	8	Yes
hsa-miR-489-3p	miRNA	Hofbauer	7	No
hsa-miR-511-3p	miRNA	Hofbauer	10	No
hsa-miR-511-5p	miRNA	Hofbauer	10	No
hsa-miR-5187-5p	miRNA	Hofbauer	1	No
hsa-miR-548at-5p	miRNA	Hofbauer	17	No
hsa-miR-548ax	miRNA	Hofbauer	X	No
hsa-miR-548j-5p	miRNA	Hofbauer	22	No
hsa-miR-550a-3-5p	miRNA	Hofbauer	7	No
hsa-miR-550a-5p	miRNA	Hofbauer	7	No
hsa-miR-5586-3p	miRNA	Hofbauer	14	No
hsa-miR-589-3p	miRNA	Hofbauer	7	No
hsa-miR-628-5p	miRNA	Hofbauer	15	Yes
hsa-miR-6501-3p	miRNA	Hofbauer	21	No
hsa-miR-6503-3p	miRNA	Hofbauer	11	No
hsa-miR-6503-5p	miRNA	Hofbauer	11	No
hsa-miR-651-5p	miRNA	Hofbauer	X	Yes
hsa-miR-652-5p	miRNA	Hofbauer	X	Yes
hsa-miR-653-3p	miRNA	Hofbauer	7	No
hsa-miR-653-5p	miRNA	Hofbauer	7	No
hsa-miR-6718-5p	miRNA	Hofbauer	18	No
hsa-miR-6735-5p	miRNA	Hofbauer	1	No
hsa-miR-676-3p	miRNA	Hofbauer	X	No
hsa-miR-6763-5p	miRNA	Hofbauer	12	No
hsa-miR-6780a-5p	miRNA	Hofbauer	17	No
hsa-miR-6780b-5p	miRNA	Hofbauer	6	No
hsa-miR-6810-3p	miRNA	Hofbauer	2	No
hsa-miR-6810-5p	miRNA	Hofbauer	2	No
hsa-miR-6813-3p	miRNA	Hofbauer	20	No
hsa-miR-6813-5p	miRNA	Hofbauer	20	No
hsa-miR-6837-5p	miRNA	Hofbauer	7	No
hsa-miR-6842-3p	miRNA	Hofbauer	8	No
hsa-miR-6885-5p	miRNA	Hofbauer	19	No
hsa-miR-760	miRNA	Hofbauer	1	Yes
hsa-miR-766-5p	miRNA	Hofbauer	X	No
hsa-miR-95-3p	miRNA	Hofbauer	4	Yes
hsa-miR-10396a-5p	miRNA	Hofbauer	21	No
hsa-miR-10396b-5p	miRNA	Hofbauer	21	No
hsa-miR-10399-3p	miRNA	Hofbauer	7	No
hsa-miR-10399-5p	miRNA	Hofbauer	7	No
hsa-miR-9901	miRNA	Hofbauer	16	No
piR-30281	piRNA	Hofbauer	5	No
piR-32619	piRNA	Hofbauer	11	No
piR-58555	piRNA	Hofbauer	19	No
SNORA80B	snoRNA	Hofbauer	2	No
SNORD115-30	snoRNA	Hofbauer	15	No
hsa-let-7e-3p	miRNA	Stromal	19	Yes
hsa-miR-202-3p	miRNA	Stromal	10	Yes
hsa-miR-204-3p	miRNA	Stromal	9	Yes
hsa-miR-214-5p	miRNA	Stromal	1	Yes
hsa-miR-323b-5p	miRNA	Stromal	14	Yes
hsa-miR-329-5p	miRNA	Stromal	14	Yes
hsa-miR-346	miRNA	Stromal	10	Yes
hsa-miR-381-5p	miRNA	Stromal	14	No
hsa-miR-382-3p	miRNA	Stromal	14	Yes
hsa-miR-433-5p	miRNA	Stromal	14	Yes
hsa-miR-487b-5p	miRNA	Stromal	14	Yes
hsa-miR-494-5p	miRNA	Stromal	14	Yes
hsa-miR-541-3p	miRNA	Stromal	14	No
hsa-miR-6511b-5p	miRNA	Stromal	16	No
hsa-miR-655-5p	miRNA	Stromal	14	Yes
hsa-miR-6756-3p	miRNA	Stromal	11	No
hsa-miR-6770-5p	miRNA	Stromal	16	No
hsa-miR-758-5p	miRNA	Stromal	14	Yes
hsa-miR-887-5p	miRNA	Stromal	5	No
piR-31264	piRNA	Stromal	11	No
piR-33372	piRNA	Stromal	14	No

## Sheet: ST4
ST4: PubMedIDs of the cell type associated sncRNAs that have been previoulsy reported to be associated with the human placenta. 39 of the 115 cell type-associated sncRNAs (all miRNAs) which have been previously published in placental studies.
miRNA precursor	PubMed ID (PMID)
hsa-let-7e	34233591, 32117280, 31215730, 25747134
hsa-let-7f-1	34534911, 29953638
hsa-miR-146b	35751569, 34727826, 34517910, 33897883, 33409877, 33310299, 33059199, 32090966, 31588496, 31264164, 29678844, 28748483, 27636999, 27029214, 26345457, 20647767, 20417706, 34953275, 26699100
hsa-miR-149	36206604, 34051087, 32250737, 31148230, 30713088, 23639576, 33819864, 28785370, 28463968, 25738738, 18218722
hsa-miR-150	37156185, 32250744, 34696694, 26406295
hsa-miR-183	36988055, 33164209, 33139493, 32342983, 30730971, 25269776, 24853279, 22911744
hsa-miR-190b	32862769
hsa-miR-197	33228451, 28758828, 23830491
hsa-miR-200c	26992682, 21079238
hsa-miR-202	29153693, 35361385, 26507872
hsa-miR-204	34867824, 32798766, 31582211, 26003727, 30575983
hsa-miR-205	34101306, 20065103
hsa-miR-20b	33176419, 31966433, 26394310, 24405935, 24282500, 22438230
hsa-miR-210	34365964, 32014817, 36910147, 35644449, 35543206, 34920271, 34611295, 34360981, 33990028, 33921262, 33669156, 33516697, 32337535, 32092293, 31616934, 31115130, 30993882, 30659946, 30569125, 29301980, 36538649, 35954272, 34741137, 34368147, 34255065, 33778218, 33734019, 32873364
hsa-miR-212	34470571, 33153492, 30388265
hsa-miR-214	34652251, 34606403, 32113857, 31885100, 36524356, 35905790, 25931214, 25876995, 32878300, 28368446
hsa-miR-3074	35964709, 34044364, 28826362
hsa-miR-3127	34978042
hsa-miR-323b	36360255
hsa-miR-329	24143215
hsa-miR-33b	36531251, 35325806
hsa-miR-340	35809813, 31523056, 29686286
hsa-miR-346	35032791, 35032791, 28753968, 28753968, 27619846, 27619846, 32319541, 32319541
hsa-miR-34c	37008948, 26735129, 21513988, 21093846, 20731307
hsa-miR-363	36368448, 25499681, 23438603
hsa-miR-365a	36503407
hsa-miR-382	36360255
hsa-miR-433	35203692
hsa-miR-449a	35812382, 35812382
hsa-miR-486	35477045, 33977502, 28531338, 29973278
hsa-miR-487b	28785370, 36360255
hsa-miR-494	37278055, 36478207, 32587240, 32353660, 27149081, 25660325, 31058973
hsa-miR-628	33923172
hsa-miR-651	33942988
hsa-miR-652	36437340, 30839116
hsa-miR-655	36123601, 33155190
hsa-miR-758	34792485
hsa-miR-760	36281935, 36281935, 35121166, 35121166
hsa-miR-95	37030589, 32924237

## Sheet: ST5
ST5: miRNA-CpG pairs that showed high expression-methylation correlation (statistically significant and non-significant) in term sorted-cell samples, or in term villi samples specifically within C14MC/C19MC
miRNA	CpG	BH p-value	Spearman Correlation	Detected within
hsa-miR-944	cg13894444	0.743034	0.716384	Cytotrophoblast
hsa-miR-944	cg08876403	0.743034	0.68092	Cytotrophoblast
hsa-miR-548b-5p	cg11883418	0.743034	0.664348	Cytotrophoblast
hsa-miR-183-3p	cg15919924	0.743034	0.631583	Cytotrophoblast
hsa-miR-6511b-5p	cg05034169	0.743034	0.626684	Stromal
hsa-miR-944	cg05512735	0.743034	0.624176	Cytotrophoblast
hsa-miR-6718-5p	cg16128363	0.743034	0.611682	Hofbauer
hsa-miR-3127-5p	cg03832227	0.743034	-0.652606	Hofbauer
hsa-miR-200c-5p	cg10355455	0.743034	-0.683115	Cytotrophoblast
hsa-miR-6756-3p	cg12957814	0.0738495	-0.802251	Stromal
hsa-miR-376a-2-5p	cg01803704	0.43	0.87	C14MC
hsa-miR-539-5p	cg15321108	0.43	0.85	C14MC
hsa-miR-377-5p	cg20547131	0.43	0.85	C14MC
hsa-miR-299-5p	cg07505932	0.43	0.84	C14MC
hsa-miR-654-5p	cg14219236	0.43	0.84	C14MC
hsa-miR-409-3p	cg03153765	0.44	0.83	C14MC
hsa-miR-654-3p	cg18186343	0.44	0.83	C14MC
hsa-miR-758-5p	cg19883293	0.44	0.82	C14MC
hsa-miR-377-5p	cg02174748	0.44	0.81	C14MC
hsa-miR-377-5p	cg03663955	0.44	0.81	C14MC
hsa-miR-380-5p	cg06963672	0.44	0.81	C14MC
hsa-miR-323b-3p	cg10516465	0.44	0.81	C14MC
hsa-miR-136-3p	cg10931901	0.49	0.81	C14MC
hsa-miR-380-5p	cg12782201	0.44	0.81	C14MC
hsa-miR-665	cg12837173	0.44	0.81	C14MC
hsa-miR-376a-2-5p	cg16204357	0.44	0.81	C14MC
hsa-miR-409-3p	cg19628497	0.44	0.81	C14MC
hsa-miR-380-5p	cg22977139	0.44	0.81	C14MC
hsa-miR-495-3p	cg01066494	0.46	-0.81	C14MC
hsa-miR-656-3p	cg04545835	0.44	-0.81	C14MC
hsa-miR-409-3p	cg19478371	0.44	-0.81	C14MC
hsa-miR-431-3p	cg19700955	0.44	-0.81	C14MC
hsa-miR-376a-2-5p	cg01066494	0.44	-0.82	C14MC
hsa-miR-543	cg05100846	0.44	-0.82	C14MC
hsa-miR-323a-3p	cg08051604	0.44	-0.83	C14MC
hsa-miR-1185-2-3p	cg04545835	0.43	-0.84	C14MC
hsa-miR-381-5p	cg04545835	0.43	-0.84	C14MC
hsa-miR-494-3p	cg08253808	0.43	-0.85	C14MC
hsa-miR-518a-3p	cg22025854	0.97	0.84	C19MC
hsa-miR-520g-3p	cg27369447	0.97	0.83	C19MC
hsa-miR-524-3p	cg27369447	0.97	0.83	C19MC
hsa-miR-519d-5p	cg04421162	0.97	0.82	C19MC
hsa-miR-526a-3p	cg18403970	0.97	0.81	C19MC
hsa-miR-519c-3p	cg22025854	0.99	0.81	C19MC
hsa-miR-518b	cg26633373	0.99	0.81	C19MC
hsa-miR-512-3p	cg27369447	0.99	0.81	C19MC
hsa-miR-519e-5p	cg01434523	0.97	-0.81	C19MC
hsa-miR-512-3p	cg09503045	0.97	-0.81	C19MC
hsa-miR-523-3p	cg24815529	0	-0.9	C19MC
